# Supplementary material for: Genome-Wide Identification and Characterization of the CCT Gene Family in Foxtail Millet (Setaria italica) Response to Diurnal Rhythm and Abiotic Stress
Source: MDPI journal article supplement (doi:10.3390/genes13101829), 2022-10-10
Supplement: s1 [file s1]

Table S2: List of CCT genes in *Arabidopsis*, rice, and foxtail millet.

| Plant Specie                 | Transcript ID   | Gene Name             | Gene Symbol    | Gene Family |
|------------------------------|-----------------|-----------------------|----------------|-------------|
| <i>Setaria italica</i>       | KQL27760        | <i>SETIT_019213mg</i> | <i>SiCCT1</i>  | COL         |
| <i>Setaria italica</i>       | KQL28473        | <i>SETIT_017487mg</i> | <i>SiCCT2</i>  | COL         |
| <i>Setaria italica</i>       | KQL31286        | <i>SETIT_017374mg</i> | <i>SiCCT5</i>  | COL         |
| <i>Setaria italica</i>       | KQL31326        | <i>SETIT_019803mg</i> | <i>SiCCT6</i>  | COL         |
| <i>Setaria italica</i>       | KQL31374        | <i>SETIT_017124mg</i> | <i>SiCCT7</i>  | COL         |
| <i>Setaria italica</i>       | KQL24119        | <i>SETIT_030034mg</i> | <i>SiCCT8</i>  | COL         |
| <i>Setaria italica</i>       | KQL27073        | <i>SETIT_030140mg</i> | <i>SiCCT10</i> | COL         |
| <i>Setaria italica</i>       | KQL10228        | <i>SETIT_006432mg</i> | <i>SiCCT16</i> | COL         |
| <i>Setaria italica</i>       | KQL11132        | <i>SETIT_006690mg</i> | <i>SiCCT17</i> | COL         |
| <i>Setaria italica</i>       | KQL01176        | <i>SETIT_014224mg</i> | <i>SiCCT20</i> | COL         |
| <i>Setaria italica</i>       | KQK97912        | <i>SETIT_010592mg</i> | <i>SiCCT23</i> | COL         |
| <i>Setaria italica</i>       | KQK87465        | <i>SETIT_035937mg</i> | <i>SiCCT30</i> | COL         |
| <i>Setaria italica</i>       | KQK90887        | <i>SETIT_034611mg</i> | <i>SiCCT34</i> | COL         |
| <i>Arabidopsis thaliana</i>  | AT5G57660.1     | <i>AT5G57660</i>      | COL5           | COL         |
| <i>Arabidopsis thaliana</i>  | AT2G24790.1     | <i>AT2G24790</i>      | COL3           | COL         |
| <i>Arabidopsis thaliana</i>  | AT5G15850.1     | <i>AT5G15850</i>      | COL1           | COL         |
| <i>Arabidopsis thaliana</i>  | AT3G07650.1     | <i>AT3G07650</i>      | COL9           | COL         |
| <i>Arabidopsis thaliana</i>  | AT5G24930.1     | <i>AT5G24930</i>      | COL4           | COL         |
| <i>Arabidopsis thaliana</i>  | AT4G15250.1     | <i>AT4G15250</i>      | COL11          | COL         |
| <i>Arabidopsis thaliana</i>  | AT1G68520.1     | <i>AT1G68520</i>      | COL6           | COL         |
| <i>Arabidopsis thaliana</i>  | AT1G73870.1     | <i>AT1G73870</i>      | COL7           | COL         |
| <i>Arabidopsis thaliana</i>  | AT5G48250.1     | <i>AT5G48250</i>      | COL10          | COL         |
| <i>Arabidopsis thaliana</i>  | AT1G25440.1     | <i>AT1G25440</i>      | COL16          | COL         |
| <i>Arabidopsis thaliana</i>  | AT5G15840.1     | <i>AT5G15840</i>      | CO             | COL         |
| <i>Arabidopsis thaliana</i>  | AT2G47890.1     | <i>AT2G47890</i>      | COL13          | COL         |
| <i>Arabidopsis thaliana</i>  | AT2G33500.1     | <i>AT2G33500</i>      | COL14          | COL         |
| <i>Arabidopsis thaliana</i>  | AT1G49130.1     | <i>AT1G49130</i>      |                | COL         |
| <i>Arabidopsis thaliana</i>  | AT3G02380.1     | <i>AT3G02380</i>      | COL2           | COL         |
| <i>Arabidopsis thaliana</i>  | AT1G28050.1     | <i>AT1G28050</i>      | COL15          | COL         |
| <i>Arabidopsis thaliana</i>  | AT3G21880.1     | <i>AT3G21880</i>      |                | COL         |
| <i>Oryza sativa Japonica</i> | Os02t0724000-01 | <i>Os02g0724000</i>   | DTH2           | COL         |
| <i>Oryza sativa Japonica</i> | Os06t0264200-00 | <i>Os06g0264200</i>   |                | COL         |
| <i>Oryza sativa Japonica</i> | Os09t0509700-01 | <i>Os09g0509700</i>   |                | COL         |
| <i>Oryza sativa Japonica</i> | Os04t0497700-01 | <i>Os04g0497700</i>   |                | COL         |
| <i>Oryza sativa Japonica</i> | Os06t0275000-01 | <i>Os06g0275000</i>   | Hd1            | COL         |
| <i>Oryza sativa Japonica</i> | Os08t0536300-01 | <i>Os08g0536300</i>   |                | COL         |
| <i>Oryza sativa Japonica</i> | Os07t0667300-01 | <i>Os07g0667300</i>   |                | COL         |
| <i>Oryza sativa Japonica</i> | Os03t0711100-01 | <i>Os03g0711100</i>   |                | COL         |
| <i>Oryza sativa Japonica</i> | Os03t0351100-01 | <i>Os03g0351100</i>   |                | COL         |
| <i>Oryza sativa Japonica</i> | Os06t0298200-01 | <i>Os06g0298200</i>   |                | COL         |
| <i>Oryza sativa Japonica</i> | Os02t0610500-01 | <i>Os02g0610500</i>   |                | COL         |
| <i>Oryza sativa Japonica</i> | Os02t0178100-01 | <i>Os02g0178100</i>   |                | COL         |
| <i>Oryza sativa Japonica</i> | Os09t0240200-01 | <i>Os09g0240200</i>   |                | COL         |

| Plant Specie                 | Transcript ID   | Gene Name      | Gene_Symbol | Gene Family |
|------------------------------|-----------------|----------------|-------------|-------------|
| <i>Setaria italica</i>       | KQL28750        | SETIT_017125mg | SiCCT3      | CMF         |
| <i>Setaria italica</i>       | KQL13967        | SETIT_022659mg | SiCCT12     | CMF         |
| <i>Setaria italica</i>       | KQL15112        | SETIT_024852mg | SiCCT13     | CMF         |
| <i>Setaria italica</i>       | KQL16011        | SETIT_024038mg | SiCCT14     | CMF         |
| <i>Setaria italica</i>       | KQL16012        | SETIT_024806mg | SiCCT15     | CMF         |
| <i>Setaria italica</i>       | KQL11783        | SETIT_006750mg | SiCCT18     | CMF         |
| <i>Setaria italica</i>       | KQL01011        | SETIT_014122mg | SiCCT19     | CMF         |
| <i>Setaria italica</i>       | KQL02690        | SETIT_014037mg | SiCCT21     | CMF         |
| <i>Setaria italica</i>       | KQK96183        | SETIT_011920mg | SiCCT22     | CMF         |
| <i>Setaria italica</i>       | KQL00040        | SETIT_011862mg | SiCCT24     | CMF         |
| <i>Setaria italica</i>       | KQK93230        | SETIT_027626mg | SiCCT25     | CMF         |
| <i>Setaria italica</i>       | KQK95022        | SETIT_027518mg | SiCCT27     | CMF         |
| <i>Setaria italica</i>       | KQK86275        | SETIT_039184mg | SiCCT28     | CMF         |
| <i>Setaria italica</i>       | KQK87242        | SETIT_036747mg | SiCCT29     | CMF         |
| <i>Setaria italica</i>       | KQK87704        | SETIT_036492mg | SiCCT31     | CMF         |
| <i>Setaria italica</i>       | KQK88797        | SETIT_035901mg | SiCCT32     | CMF         |
| <i>Setaria italica</i>       | KQK89929        | SETIT_036910mg | SiCCT33     | CMF         |
| <i>Setaria italica</i>       | KQK92647        | SETIT_039219mg | SiCCT36     | CMF         |
| <i>Setaria italica</i>       | KQK85264        | SETIT_020907mg | SiCCT37     | CMF         |
| <i>Arabidopsis thaliana</i>  | AT5G41380.1     | AT5G41380      |             | CMF         |
| <i>Arabidopsis thaliana</i>  | AT4G27900.1     | AT4G27900      |             | CMF         |
| <i>Arabidopsis thaliana</i>  | AT2G33350.1     | AT2G33350      |             | CMF         |
| <i>Arabidopsis thaliana</i>  | AT4G25990.1     | AT4G25990      | CIL         | CMF         |
| <i>Arabidopsis thaliana</i>  | AT1G04500.1     | AT1G04500      |             | CMF         |
| <i>Arabidopsis thaliana</i>  | AT5G14370.1     | AT5G14370      |             | CMF         |
| <i>Arabidopsis thaliana</i>  | AT5G53420.1     | AT5G53420      |             | CMF         |
| <i>Arabidopsis thaliana</i>  | AT1G63820.1     | AT1G63820      |             | CMF         |
| <i>Arabidopsis thaliana</i>  | AT1G07050.1     | AT1G07050      |             | CMF         |
| <i>Arabidopsis thaliana</i>  | AT5G59990.1     | AT5G59990      |             | CMF         |
| <i>Oryza sativa Japonica</i> | Os05t0466100-01 | Os05g0466100   |             | CMF         |
| <i>Oryza sativa Japonica</i> | Os03t0139500-01 | Os03g0139500   |             | CMF         |
| <i>Oryza sativa Japonica</i> | Os05t0595300-02 | Os05g0595300   |             | CMF         |
| <i>Oryza sativa Japonica</i> | Os02t0148000-01 | Os02g0148000   |             | CMF         |
| <i>Oryza sativa Japonica</i> | Os10t0560400-01 | Os10g0560400   |             | CMF         |
| <i>Oryza sativa Japonica</i> | Os11t0101200-01 | Os11g0101200   |             | CMF         |
| <i>Oryza sativa Japonica</i> | Os07t0261200-01 | Os07g0261200   | GHD7        | CMF         |
| <i>Oryza sativa Japonica</i> | Os06t0699600-01 | Os06g0699600   |             | CMF         |
| <i>Oryza sativa Japonica</i> | Os01t0835700-01 | Os01g0835700   |             | CMF         |
| <i>Oryza sativa Japonica</i> | Os12t0101000-01 | Os12g0101000   |             | CMF         |
| <i>Oryza sativa Japonica</i> | Os08t0119700-00 | Os08g0119700   |             | CMF         |
| <i>Oryza sativa Japonica</i> | Os10t0466500-01 | Os10g0466500   |             | CMF         |

| Plant Specie                 | Transcript ID   | Gene Name             | gene_symbol    | Gene Family |
|------------------------------|-----------------|-----------------------|----------------|-------------|
| <i>Setaria italica</i>       | KQL30521        | <i>SETIT_016922mg</i> | <i>SiCCT4</i>  | PRR         |
| <i>Setaria italica</i>       | KQL25444        | <i>SETIT_029202mg</i> | <i>SiCCT9</i>  | PRR         |
| <i>Setaria italica</i>       | KQL27318        | <i>SETIT_033274mg</i> | <i>SiCCT11</i> | PRR         |
| <i>Setaria italica</i>       | KQK91381        | <i>SETIT_034368mg</i> | <i>SiCCT35</i> | PRR         |
| <i>Setaria italica</i>       | KQK93667        | <i>SETIT_026170mg</i> | <i>SiCCT26</i> | PRR         |
| <i>Arabidopsis thaliana</i>  | AT2G46790.1     | <i>AT2G46790</i>      | <i>APRR9</i>   | PRR         |
| <i>Arabidopsis thaliana</i>  | AT5G60100.1     | <i>AT5G60100</i>      | <i>PRR3</i>    | PRR         |
| <i>Arabidopsis thaliana</i>  | AT5G61380.1     | <i>AT5G61380</i>      | <i>APRR1</i>   | PRR         |
| <i>Arabidopsis thaliana</i>  | AT5G24470.1     | <i>AT5G24470</i>      | <i>APRR5</i>   | PRR         |
| <i>Arabidopsis thaliana</i>  | AT5G02810.1     | <i>AT5G02810</i>      | <i>APRR7</i>   | PRR         |
| <i>Oryza sativa Japonica</i> | Os09t0532400-01 | <i>Os09g0532400</i>   |                | PRR         |
| <i>Oryza sativa Japonica</i> | Os02t0618200-01 | <i>Os02g0618200</i>   |                | PRR         |
| <i>Oryza sativa Japonica</i> | Os11t0157600-01 | <i>Os11g0157600</i>   |                | PRR         |
| <i>Oryza sativa Japonica</i> | Os07t0695100-01 | <i>Os07g0695100</i>   | <i>Hd2</i>     | PRR         |
| <i>Oryza sativa Japonica</i> | Os03t0284100-01 | <i>Os03g0284100</i>   |                | PRR         |
