# Supplementary material for: Genome-Wide Identification and Characterization of the CCT Gene Family in Foxtail Millet (Setaria italica) Response to Diurnal Rhythm and Abiotic Stress
Source: MDPI journal article supplement (doi:10.3390/genes13101829), 2022-10-10
Supplement: s1 [file s1]

Table S1 Primer name and sequence information of *SiCCT*

| Primer name          | Primer sequences                  | Number of bases |
|----------------------|-----------------------------------|-----------------|
| <i>SiqCCT-1-1-F</i>  | 5'--TCAGGATGCGGTGGCTCTTCA--3'     | 21              |
| <i>SiqCCT-1-1-R</i>  | 5'--GCCTCTTCTCTTGCTGCTTCGT--3'    | 22              |
| <i>SiqCCT-2-1-F</i>  | 5'--CTACCCACAGTGTGTCGTCTTTGAA--3' | 25              |
| <i>SiqCCT-2-1-R</i>  | 5'--ACCGCCTGTTCTTCCGCTTCT--3'     | 21              |
| <i>SiqCCT-3-1-F</i>  | 5'--CGCCAGAGAAGAAGAAGAGCAAGA--3'  | 24              |
| <i>SiqCCT-3-1-R</i>  | 5'--TTGTCGGACCACGCCTTGAG--3'      | 20              |
| <i>SiqCCT-4-1-F</i>  | 5'--AATCCTTCTGTTGCTGAGCCTGAG--3'  | 24              |
| <i>SiqCCT-4-1-R</i>  | 5'--GAATCTAACCGACTGCCACCTCTT--3'  | 24              |
| <i>SiqCCT-5-1-F</i>  | 5'--TGGCATCCTCCTGGTCCTGAAG--3'    | 22              |
| <i>SiqCCT-5-1-R</i>  | 5'--TTGGCTTAGCGGATCGTAGTCATAC--3' | 25              |
| <i>SiqCCT-6-1-F</i>  | 5'--AGTAGACTCCTGGCTCCTGTTTAC--3'  | 24              |
| <i>SiqCCT-6-1-R</i>  | 5'--CACTCCATTCCGTTGCTCCATACC--3'  | 24              |
| <i>SiqCCT-7-1-F</i>  | 5'--GGAGCCTGGATCTCAGACTCAACT--3'  | 24              |
| <i>SiqCCT-7-1-R</i>  | 5'--CGCACCTCGTACCGTATCTTCTTG--3'  | 24              |
| <i>SiqCCT-8-1-F</i>  | 5'--CAATGCGGTATCTGCTGACTCTGG--3'  | 24              |
| <i>SiqCCT-8-1-R</i>  | 5'--AGACTGGACCTAGCCTGCCTTG--3'    | 22              |
| <i>SiqCCT-9-1-F</i>  | 5'--TCTGCCATAAGTCCTCCTAATTCCA--3' | 25              |
| <i>SiqCCT-9-1-R</i>  | 5'--CCGCTGCCGCTGAGAGTATT--3'      | 20              |
| <i>SiqCCT-10-1-F</i> | 5'--GGCTTCATCAGAGTATGGCATTGGA--3' | 25              |
| <i>SiqCCT-10-1-R</i> | 5'--GTTGCTGTCGTCGGTCGTCATC--3'    | 22              |
| <i>SiqCCT-11-1-F</i> | 5'--CAATGACAACGACGAGGACGATGA--3'  | 24              |
| <i>SiqCCT-11-1-R</i> | 5'--TCTGGAGACATAGCCTGTGGACTG--3'  | 24              |
| <i>SiqCCT-12-1-F</i> | 5'--AACGAACCTTCAGACGCCTTGTTG--3'  | 23              |
| <i>SiqCCT-12-1-R</i> | 5'--TCAGCAGGTCGCATTCTTCAATCTT--3' | 25              |
| <i>SiqCCT-13-1-F</i> | 5'--CACCTTCTCTTGCTCGTCTCCTTC--3'  | 24              |
| <i>SiqCCT-13-1-R</i> | 5'--GCTCAATCTTCTCCTTGCGTTCTTC--3' | 25              |
| <i>SiqCCT-15-1-F</i> | 5'--CGCTTGATATAAAGAAACGGAACG--3'  | 25              |
| <i>SiqCCT-15-1-R</i> | 5'--GCAAACATTCCACGGACACG--3'      | 20              |
| <i>SiqCCT-17-1-F</i> | 5'--GGTGCCATCGAGCTGGACTTCA--3'    | 22              |
| <i>SiqCCT-17-1-R</i> | 5'--CGACGACACGCTGTGACTCTGA--3'    | 22              |
| <i>SiqCCT-18-1-F</i> | 5'--AGCAGCAGCAGCAGCAGATG--3'      | 20              |
| <i>SiqCCT-18-1-R</i> | 5'--CTCTTCTTCCTCGCCGTCCTCT--3'    | 22              |
| <i>SiqCCT-19-1-F</i> | 5'--GCTGCTGCTCAAGCTGGACTAC--3'    | 22              |
| <i>SiqCCT-19-1-R</i> | 5'--TTCTCCTTGATCGCCTCACCTTCT--3'  | 25              |
| <i>SiqCCT-20-1-F</i> | 5'--AACCGCAAGTTCCAGAAGACCATC--3'  | 24              |
| <i>SiqCCT-20-1-R</i> | 5'--CGTCGGAGAAGGAGAGCCAGAA--3'    | 22              |
| <i>SiqCCT-21-1-F</i> | 5'--ACGATGGATGGACCGACAACCT--3'    | 22              |
| <i>SiqCCT-21-1-R</i> | 5'--GGATGTGCTTCTCATACCTGCGATT--3' | 25              |
| <i>SiqCCT-22-1-F</i> | 5'--CGAGCCGCCTTCTCCATCTTCA--3'    | 22              |
| <i>SiqCCT-22-1-R</i> | 5'--GATGCTTTCGTGGTCGTCCTGTC--3'   | 23              |
| <i>SiqCCT-23-1-F</i> | 5'--ACAGCGTGTATCGTCGGAAG--3'      | 21              |
| <i>SiqCCT-23-1-R</i> | 5'--ACATCTCCTCCTCGTGCTCCTC--3'    | 22              |

|                      |                                   |    |
|----------------------|-----------------------------------|----|
| <i>SiqCCT-24-1-F</i> | 5'--ATTCCAATGCCATCCTCTCCTATCG--3' | 25 |
| <i>SiqCCT-24-1-R</i> | 5'--TACCGTTGCTCTTCCTCCCTGTC--3'   | 23 |
| <i>SiqCCT-25-1-F</i> | 5'--CGGGAGCGCATCGACAAGTA--3'      | 20 |
| <i>SiqCCT-25-1-R</i> | 5'--AGAGTCTTCCGGCAAGCATACG--3'    | 22 |
| <i>SiqCCT-26-1-F</i> | 5'--GAAGTGAGAAGAATGTGCGTTCCAA--3' | 25 |
| <i>SiqCCT-26-1-R</i> | 5'--TCAGCAATCCTCAAGGCATTATCCA--3' | 25 |
| <i>SiqCCT-27-1-F</i> | 5'--TCCTCATGCTTCTAAACGGCTACGA--3' | 25 |
| <i>SiqCCT-27-1-R</i> | 5'--GCTGCTGCGGCGACTGAATT--3'      | 20 |
| <i>SiqCCT-28-1-F</i> | 5'--TGAAAGCGTTGCCCTGGCTCTTC--3'   | 22 |
| <i>SiqCCT-28-1-R</i> | 5'--TTGGTGAGGCTGGTTCTCAACTG--3'   | 23 |
| <i>SiqCCT-29-1-F</i> | 5'--TGGTGATGGTGCGTGTTCCTTG--3'    | 23 |
| <i>SiqCCT-29-1-R</i> | 5'--GGTAAGTCTTGAGCTGATGCCACAA--3' | 25 |
| <i>SiqCCT-30-1-F</i> | 5'--GCCTCAGGTGAACGTGGACTTG--3'    | 22 |
| <i>SiqCCT-30-1-R</i> | 5'--GCCGCTTCCTCTTCTTGTCATCTC--3'  | 24 |
| <i>SiqCCT-31-1-F</i> | 5'--GCTCCTGGCTGTGATCCTGGTT--3'    | 22 |
| <i>SiqCCT-31-1-R</i> | 5'--TGTGGCTTCGCTGTTGCTTGC--3'     | 21 |
| <i>SiqCCT-32-1-F</i> | 5'--ACTCCACCTTATCGGCTCTCCTC--3'   | 23 |
| <i>SiqCCT-32-1-R</i> | 5'--TGCTGCTCATCTGCGTCTGC--3'      | 20 |
| <i>SiqCCT-33-1-F</i> | 5'--AGAGCGTGACGTGGCTGTTC--3'      | 20 |
| <i>SiqCCT-33-1-R</i> | 5'--GCTCCCGCAGAAGGACATGATTT--3'   | 23 |
| <i>SiqCCT-34-1-F</i> | 5'--CTGCGTCTCATCCTCTTGCTCTCA--3'  | 24 |
| <i>SiqCCT-34-1-R</i> | 5'--CCTGCTTCCTCTGGTCTTCCTCAC--3'  | 24 |
| <i>SiqCCT-35-1-F</i> | 5'--TGCTCCGTAAGTGCTGCTATGAAG--3'  | 24 |
| <i>SiqCCT-35-1-R</i> | 5'--CAGACCGATGCCAGATAGACAAGG--3'  | 24 |
| <i>SiqCCT-36-1-F</i> | 5'--CAGCAAGCAGGAGCAATTCTTACG--3'  | 24 |
| <i>SiqCCT-36-1-R</i> | 5'--TCTCTTCAGGTGACAATCGGACAAC--3' | 25 |
| <i>SiqCCT-37-1-F</i> | 5'--TGGATGGAGCCATGTACCAGCAA--3'   | 23 |
| <i>SiqCCT-37-1-R</i> | 5'--TTCTTCAGGTGACAAGCGGACAAC--3'  | 24 |
| <i>Actin-F</i>       | 5'--GTGCTTTCCCTCTACGCCAGTG--3'    | 22 |
| <i>Actin-R</i>       | 5'--ACCGCTGAGCACAATGTTACCA--3'    | 22 |

Actin gene (*SETIT\_010361mg*) was used as internal control for this experiment.
