# Supplementary material for: Genome-Wide Identification and Characterization of the CCT Gene Family in Foxtail Millet (Setaria italica) Response to Diurnal Rhythm and Abiotic Stress
Source: MDPI journal article supplement (doi:10.3390/genes13101829), 2022-10-10
Supplement: s1 [file s1]

# Genome-wide identification and characterization of the *CCT* gene family in foxtail millet (*Setaria italica*) response to diurnal rhythm and abiotic stress

Yuntong Li<sup>1†</sup>, Shumin Yu<sup>1†</sup>, Qiyuan Zhang<sup>1</sup>, Ziwei Wang<sup>1</sup>, Meiling Liu<sup>1</sup>, Ao Zhang<sup>1</sup>, Xiaomei Dong<sup>1</sup>, Jinjuan Fan<sup>1</sup>, Yanshu Zhu<sup>1</sup>, Yanye Ruan<sup>1</sup>, and Cong Li<sup>1\*</sup>

<sup>1</sup> College of Bioscience and Biotechnology, Shenyang Agricultural University, Shenyang, China

\* Correspondence: lnlicong\_123@syau.edu.cn

† These authors contributed equally to this work.

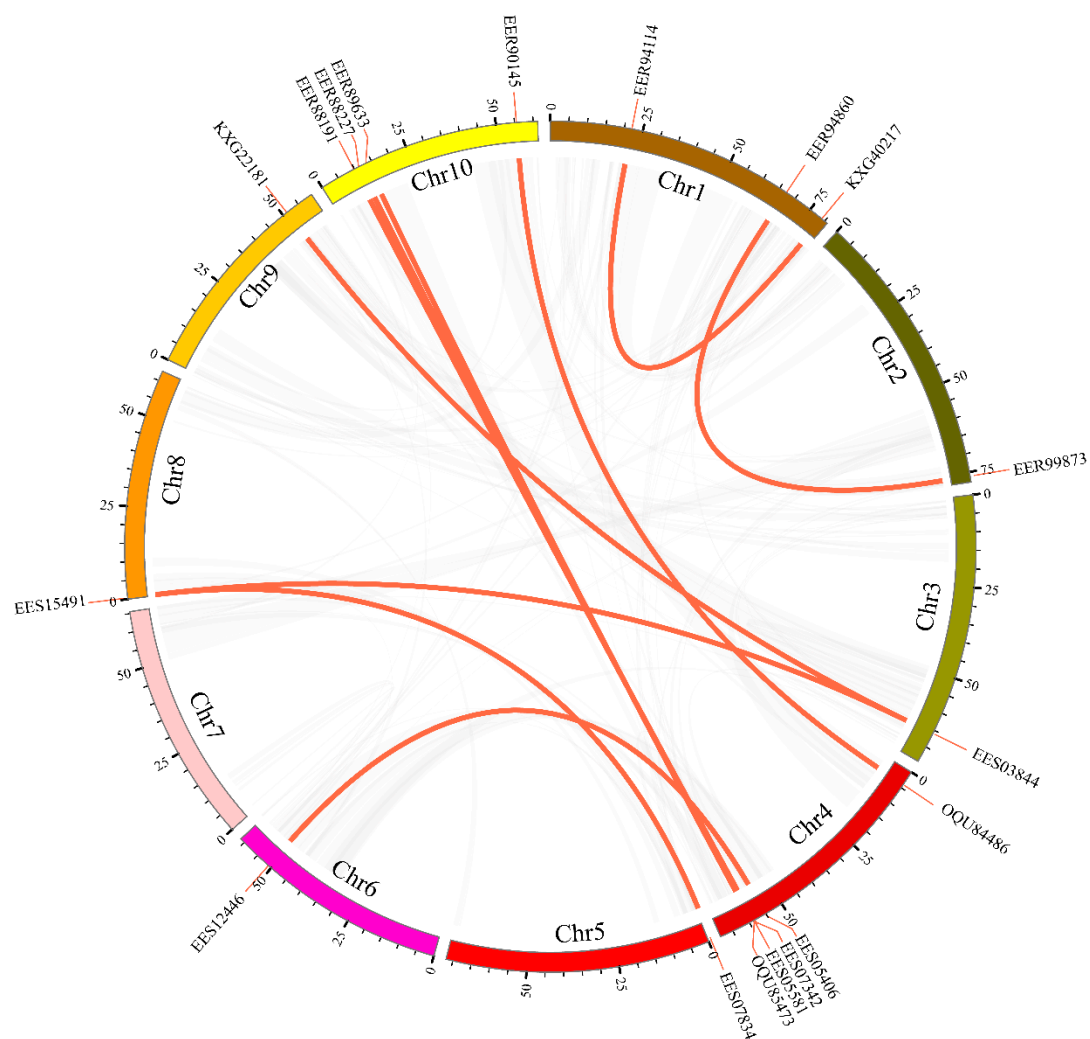

**Figure S1.** Interchromosomal relationships of sorghum CCT genes.

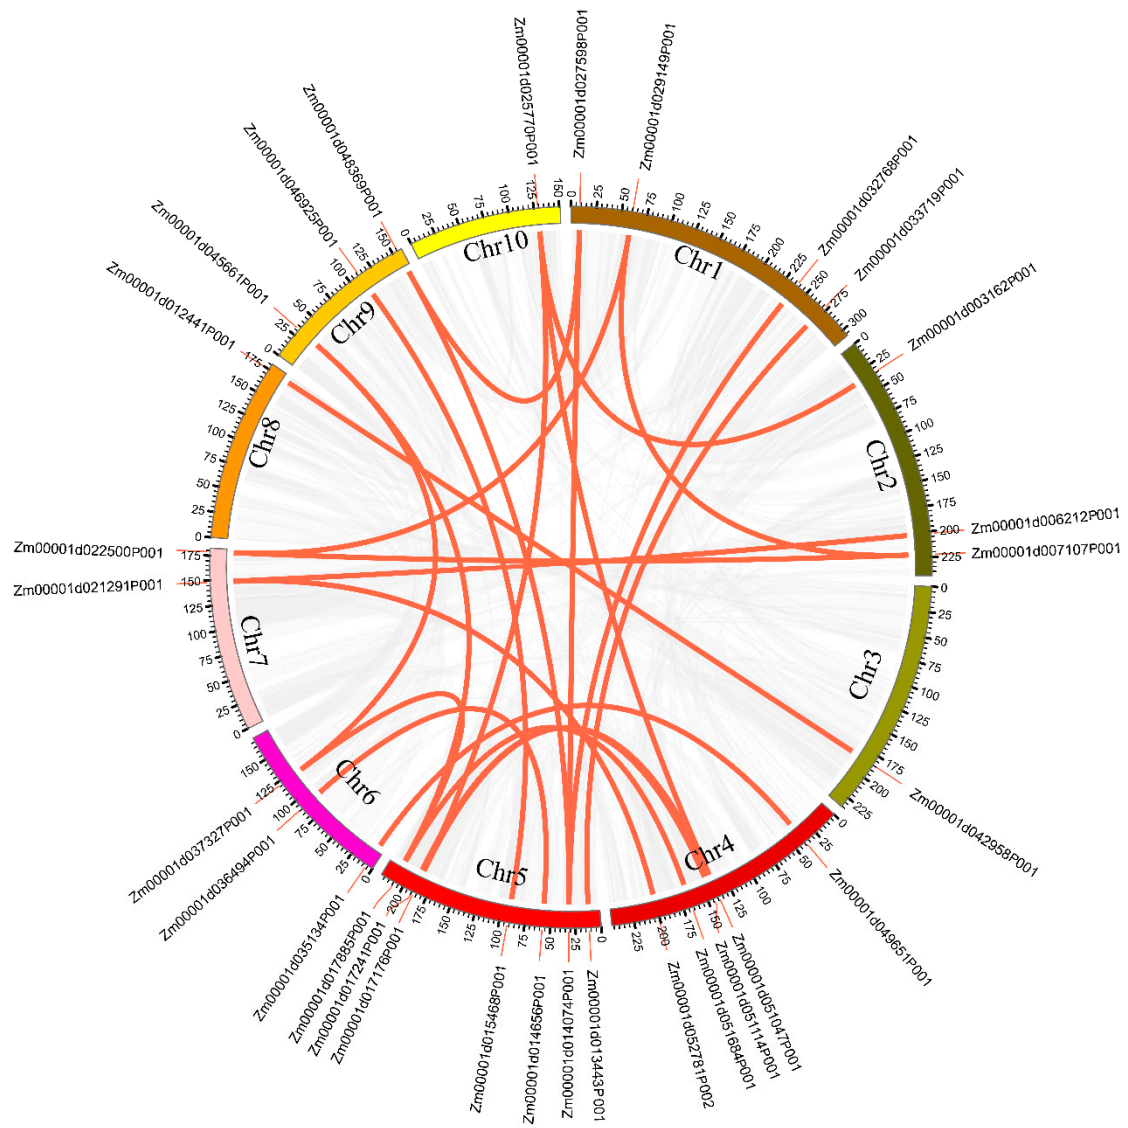

**Figure S2.** Interchromosomal relationships of maize CCT genes.

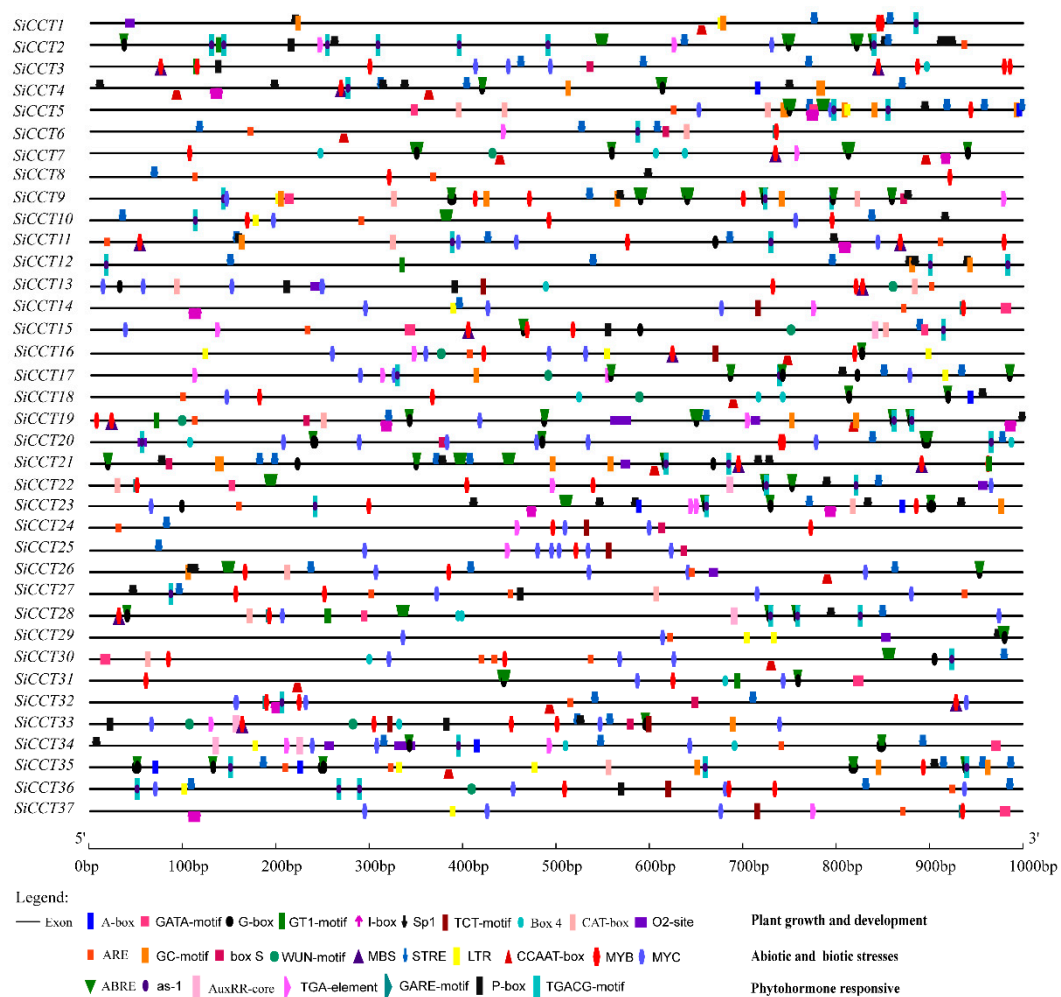

**Figure S3.** Distribution map of cis-acting elements on each gene.

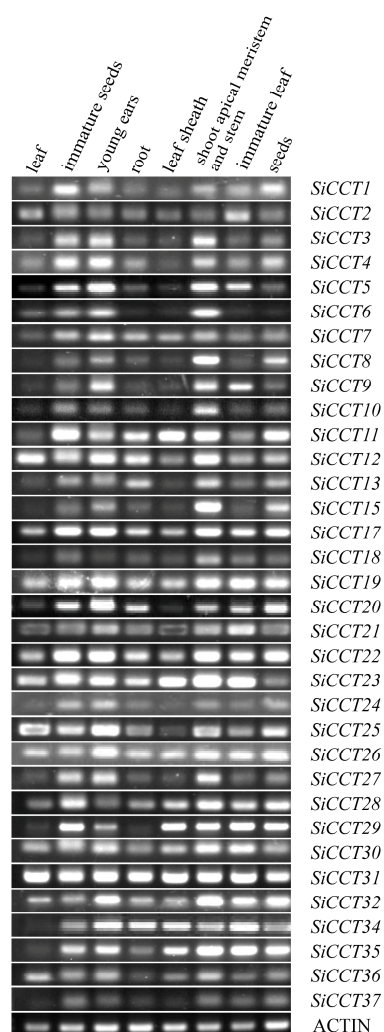

**Figure S4.** Expression profiles of SiCCT genes in different tissues of millet. The site of expression is shown at the top, and the gene name is shown on the right.

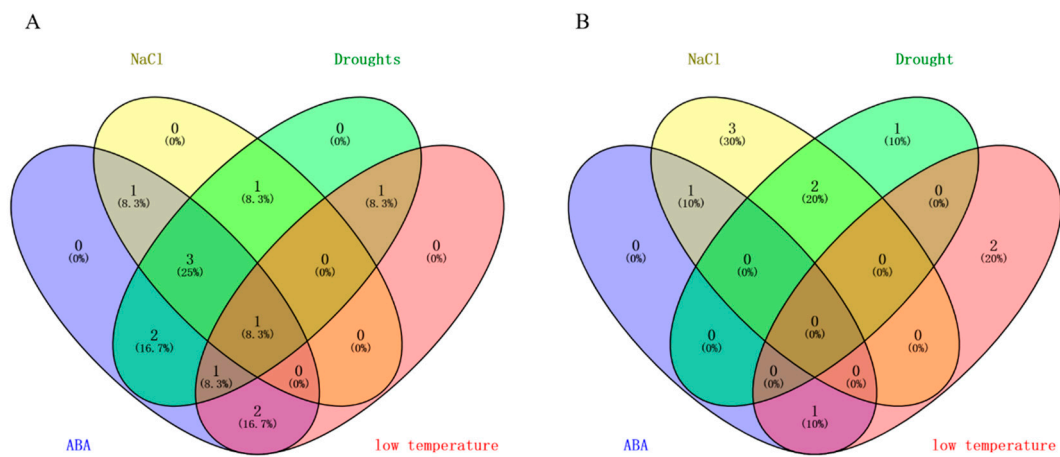

**Figure S5.** The detailed numbers of simultaneously up-regulated (**A**) and down-regulated (**B**) *SiCCT* genes by ABA (abscisic acid), NaCl, drought, and low temperature.
