# Supplementary material for: Genome-Wide Identification and Characterization of the CCT Gene Family in Foxtail Millet (Setaria italica) Response to Diurnal Rhythm and Abiotic Stress
Source: Genes (Basel). 2022 Oct 10;13(10):1829. doi: 10.3390/genes13101829 (PMC9601966; doi:10.3390/genes13101829)
Supplement: Supplementary file 1 [file genes-13-01829-s001.zip]

Archive with 6 entries (6 files):
- Supplementary Figures.pdf
- Table S1.pdf
- Table S2.pdf
- Table S3.xlsx
- Table S4.xlsx
- Table S5.xlsx
