# Supplementary material for: Genome-Wide Identification and Characterization of the CCT Gene Family in Foxtail Millet (Setaria italica) Response to Diurnal Rhythm and Abiotic Stress
Source: Genes (Basel). 2022 Oct 10;13(10):1829. doi: 10.3390/genes13101829 (PMC9601966; doi:10.3390/genes13101829)
Supplement: Supplementary file 1 [file genes-13-01829-s001.zip › Table S3.xlsx]

## Sheet: Arabidopsis and Millet
Type	Gene Name In Millet	Transcript Name In Other Species
Arabidopsis and Millet	SiCCT23	AT5G57660 (COL5)

## Sheet: Alfalfa and Millet
Table S3: List of homology genes of the CCT genes of foxtail millet with 6 representative plant species
Type	Gene Name In Millet	Transcript Name In Other Species
Alfalfa and Millet	SiCCT34	AES82084
	SiCCT35	AES88725

## Sheet: Tomato and Millet
Type	Gene Name In Millet	Transcript Name In Other Species
Tomato and Millet	SiCCT34	Solyc09g074560-3-1
	SiCCT36	Solyc09g090650-3-1

## Sheet: Rice and Millet
Type	Gene Name In Millet	Transcript Name In Other Species
Rice and Millet	SiCCT2	Os02t0178100-01
	SiCCT3	Os02t0148000-01
	SiCCT4	Os02t0618200-01
	SiCCT5	Os02t0724000-01
	SiCCT7	Os02t0731700-01
	SiCCT9	Os09t0532400-01
	SiCCT10	Os07t0667300-01
	SiCCT11	Os07t0695100-01
	SiCCT12	Os05t0595300-01
	SiCCT13	Os05t0466100-01
	SiCCT16	Os06t0263801-01
	SiCCT18	Os02t0148500-01
	SiCCT18	Os06t0698900-01
	SiCCT19	Os08t0119700-00
	SiCCT21	Os08t0536300-01
	SiCCT23	Os02t0610500-01
	SiCCT23	Os04t0497700-01
	SiCCT26	Os11t0157600-01
	SiCCT29	Os03t0734900-00
	SiCCT30	Os03t0711100-01
	SiCCT31	Os03t0684000-01
	SiCCT32	Os10t0466500-01
	SiCCT33	Os10t0560400-01
	SiCCT34	Os03t0351100-01
	SiCCT35	Os03t0284100-01
	SiCCT36	Os03t0139500-01

## Sheet: Sorghum and Millet
Type	Gene Name In Millet	Transcript Name In Other Species
Sorghum and Millet	SiCCT1	OQU84182
	SiCCT2	OQU84486
	SiCCT3	EES04516
	SiCCT4	EES05438
	SiCCT5	EES07342
	SiCCT6	OQU85473
	SiCCT7	EES05581
	SiCCT9	EER99234
	SiCCT10	EER99873
	SiCCT12	KXG22724
	SiCCT13	KXG22181
	SiCCT16	EER88191
	SiCCT18	EER88899
	SiCCT19	KXG24303
	SiCCT20	EES14798
	SiCCT21	EES14176
	SiCCT22	OQU81054
	SiCCT23	EES12446
	SiCCT26	EES08014
	SiCCT27	OQU83708
	SiCCT29	EER90915
	SiCCT30	EER93585
	SiCCT31	EER91071
	SiCCT32	EER94114
	SiCCT33	OQU92139
	SiCCT34	EER94860
	SiCCT35	EER92434
	SiCCT36	KXG40217

## Sheet: Maize and Millet
Type	Gene Name In Millet	Transcript Name In Other Species
Maize and Millet	SiCCT1	Zm00001d014964_T001
	SiCCT2	Zm00001d015468_T001
	SiCCT3	Zm00001d015268_T001
	SiCCT4	Zm00001d051114_T001
	SiCCT4	Zm00001d017241_T001
	SiCCT5	Zm00001d051684_T001
	SiCCT7	Zm00001d017939_T001
	SiCCT9	Zm00001d006212_T001
	SiCCT10	Zm00001d007107_T001
	SiCCT11	Zm00001d007240_T001
	SiCCT12	Zm00001d009773_T001
	SiCCT13	Zm00001d038407_T001
	SiCCT16	Zm00001d037327_T001
	SiCCT16	Zm00001d045661_T001
	SiCCT18	Zm00001d014656_T001
	SiCCT18	Zm00001d036494_T001
	SiCCT19	Zm00001d049651_T001
	SiCCT19	Zm00001d035134_T001
	SiCCT21	Zm00001d031662_T001
	SiCCT22	Zm00001d024909_T001
	SiCCT23	Zm00001d025770_T001
	SiCCT23	Zm00001d003162_T001
	SiCCT29	Zm00001d013331_T001
	SiCCT30	Zm00001d013443_T001
	SiCCT31	Zm00001d033523_T001
	SiCCT32	Zm00001d014074_T001
	SiCCT33	Zm00001d029885_T001
	SiCCT34	Zm00001d029149_T001
	SiCCT35	Zm00001d047761_T001
	SiCCT36	Zm00001d027598_T001
	SiCCT36	Zm00001d048369_T001
