# Supplementary material for: Genome-Wide Identification and Characterization of the CCT Gene Family in Foxtail Millet (Setaria italica) Response to Diurnal Rhythm and Abiotic Stress
Source: Genes (Basel). 2022 Oct 10;13(10):1829. doi: 10.3390/genes13101829 (PMC9601966; doi:10.3390/genes13101829)
Supplement: Supplementary file 1 [file genes-13-01829-s001.zip › Table S4.xlsx]

## Sheet: Sheet1
Table S4: The number and function statistics of promoter elements predicted in this study.			SiCCT1	SiCCT2	SiCCT3	SiCCT4	SiCCT5	SiCCT6	SiCCT7	SiCCT8	SiCCT9	SiCCT10	SiCCT11	SiCCT12	SiCCT13	SiCCT14	SiCCT15	SiCCT16	SiCCT17	SiCCT18	SiCCT19	SiCCT20	SiCCT21	SiCCT22	SiCCT23	SiCCT24	SiCCT25	SiCCT26	SiCCT27	SiCCT28	SiCCT29	SiCCT30	SiCCT31	SiCCT32	SiCCT33	SiCCT34	SiCCT35	SiCCT36	SiCCT37
Plant growth and development	light	A-box	0	0	0	1	1	0	0	0	0	0	0	0	0	0	0	0	0	1	0	0	0	0	2	0	0	0	0	0	0	0	0	0	0	1	2	0	0	8	cis-acting regulatory element
	light	ACE	0	0	0	1	0	0	0	0	0	0	0	0	0	0	0	0	0	0	0	0	0	0	0	0	0	0	0	0	0	0	0	0	0	0	0	0	0	1	cis-acting element involved in light responsiveness
	light	AE-box	0	0	0	0	0	0	0	0	0	0	0	0	0	0	0	0	0	0	0	0	0	0	0	2	0	0	0	0	0	0	0	0	0	1	0	1	0	4	part of a module for light response
	light	chs-CMA2a	0	0	0	0	0	0	1	0	0	0	0	0	0	0	0	0	0	0	0	0	0	0	0	0	0	0	0	0	0	0	0	0	0	0	0	0	0	1	part of a light responsive element
	light	chs-Unit 1 m1	0	0	0	0	0	0	0	0	0	0	1	0	0	0	0	0	0	0	0	0	0	0	0	0	0	0	0	0	0	0	0	0	0	0	0	0	0	1	part of a light responsive element
	light	circadian	0	0	0	0	0	0	0	0	0	0	0	0	1	0	0	0	1	1	1	0	0	0	0	0	0	0	0	0	0	0	0	0	0	0	0	0	0	4	cis-acting regulatory element involved in circadian control
	light	GA-motif	2	0	0	0	0	0	0	0	0	0	0	0	0	1	1	0	0	1	0	0	0	0	0	0	0	0	0	0	0	0	0	0	0	0	0	0	1	6	part of a light responsive element
	light	GATA-motif	0	0	0	0	2	0	0	0	1	0	0	0	0	1	2	0	0	0	0	0	0	1	0	0	0	0	0	1	0	1	1	0	0	1	0	0	1	12	part of a light responsive element
	light	G-box	0	6	0	2	2	0	4	0	10	0	1	0	1	0	3	1	6	2	5	6	6	3	5	0	0	2	0	3	1	1	3	0	2	3	9	0	0	87	cis-acting regulatory element involved in light responsiveness
	light	GT1-motif	0	1	1	0	0	0	0	0	0	0	0	1	0	0	0	0	0	0	1	0	1	0	0	0	0	0	0	2	0	0	1	0	0	0	0	0	0	8	light responsive element
	light	GTGGC-motif	0	0	0	0	0	0	0	0	0	0	0	0	0	0	0	0	0	0	1	0	0	0	0	0	0	0	0	0	0	0	0	0	0	0	0	0	0	1	part of a light responsive element
	light	I-box	0	0	0	1	2	0	1	0	0	0	1	0	0	1	0	0	0	0	2	0	0	0	2	0	0	0	0	0	0	0	0	1	0	0	0	0	1	12	part of a light responsive element
	light	LAMP-element	0	0	0	0	0	0	0	0	0	0	0	0	0	0	0	0	0	0	1	0	0	0	0	0	0	0	0	0	0	0	0	0	0	0	0	0	0	1	part of a light responsive element
	light	MRE	0	0	0	0	0	0	0	0	1	0	0	0	1	0	0	0	0	0	0	0	0	0	0	1	1	0	0	0	0	0	0	0	0	1	0	0	0	5	MYB binding site involved in light responsiveness
	light	Pc-CMA2a	0	0	0	0	0	0	0	0	0	0	0	0	0	0	0	1	0	0	0	0	0	0	0	0	0	0	0	0	0	0	0	0	0	0	0	0	0	1	part of a light responsive element
	light	Sp1	1	6	0	5	1	0	0	1	2	1	2	3	0	0	0	0	1	1	1	0	4	1	5	0	0	2	1	1	1	0	0	0	1	1	1	0	0	43	light responsive element
	light	TCCC-motif	0	1	0	0	0	0	0	0	0	0	1	0	0	0	0	0	0	0	0	1	0	1	0	0	0	0	0	0	0	1	0	1	0	1	0	0	0	7	part of a light responsive element
	light	TCT-motif	0	0	0	0	0	0	0	0	0	0	0	0	1	1	0	1	0	0	0	0	0	0	0	1	1	0	0	0	0	0	0	0	2	0	0	1	1	9	part of a light responsive element
	light	GATT-motif	0	0	0	0	0	0	0	0	0	0	0	0	0	0	0	0	0	0	0	0	0	0	0	0	0	0	0	0	0	0	0	0	0	1	0	0	0	1	part of a light responsive element
	light	ATC-motif	0	0	0	0	1	0	0	0	0	0	0	0	0	0	0	0	0	0	0	0	0	0	0	0	0	0	0	0	0	0	0	0	0	0	0	0	0	1	part of a conserved DNA module involved in light responsiveness
	light	ATCT-motif	1	0	0	0	0	0	0	0	0	0	0	0	0	0	0	0	0	0	0	0	0	1	0	0	0	0	0	0	0	0	0	0	0	0	0	0	0	2	part of a conserved DNA module involved in light responsiveness
	light	Box 4	0	0	1	0	0	0	3	0	0	0	0	0	1	0	0	0	0	3	0	2	0	0	0	0	0	0	0	2	0	1	1	0	1	2	0	0	0	17	part of a conserved DNA module involved in light responsiveness
	Phloem and xylem	AC-I	0	0	0	0	0	0	0	0	0	0	0	0	0	0	0	0	0	0	0	0	0	0	0	0	0	0	0	0	0	0	0	0	0	0	1	0	0	1	element conferring enhanced xylem expression and repressed phloem expression in transgenic tobacco; enhancing petal expression. Myb305 from Antirrhin
	Phloem and xylem	AC-II	0	0	0	0	0	0	0	0	1	0	0	0	0	0	0	0	0	0	0	0	0	0	0	0	0	0	0	0	0	0	0	0	0	0	0	0	0	1	element involved in negative regulation on phloem expression; and responsible for restricting vascular expression to the xylem
	Regulatory	AT-rich element	0	0	0	0	0	0	0	0	0	0	0	0	0	0	1	0	0	0	0	0	1	0	0	0	0	0	0	0	0	0	0	0	0	0	0	0	0	2	binding site of AT-rich DNA binding protein (ATBP-1)
	Regulatory	TATA-box	9	4	13	0	0	3	22	18	3	1	12	9	26	17	7	5	12	18	13	16	0	25	2	13	10	11	1	27	10	21	13	9	15	9	5	11	19	409	core promoter element around -30 of transcription start
	Regulatory	CAAT-box	7	1	21	2	13	14	24	18	8	17	13	7	15	24	16	22	15	13	19	15	10	14	3	15	19	15	21	13	17	14	15	25	14	7	9	26	24	545	common cis-acting element in promoter and enhancer regions
	Meristm	CAT-box	0	0	0	0	3	1	0	0	2	0	1	0	2	0	1	0	0	0	1	0	0	1	1	0	0	1	1	1	0	1	0	0	0	0	1	0	0	18	cis-acting regulatory element related to meristem expression
	Meristm	dOCT	0	0	0	0	0	0	0	0	0	0	0	0	0	0	0	0	0	0	0	0	1	0	0	0	0	0	0	0	0	0	0	0	0	0	0	0	0	1	cis-acting regulatory element related to meristem specific activation
	Cell cycle	E2Fb	0	0	0	0	0	0	0	0	0	0	0	0	0	0	0	0	0	0	0	0	0	1	0	0	0	0	0	1	0	1	0	0	1	0	0	0	0	4	E2F-binding site; G1-M transition of cell cycle
	Cell cycle	HD-Zip 1	0	0	0	0	0	0	0	0	0	0	0	0	0	0	0	0	0	0	0	0	0	0	0	0	0	0	0	0	0	0	0	1	0	0	0	0	0	1	element involved in differentiation of the palisade mesophyll cells
	Cell cycle	MSA-like	0	0	0	0	0	0	0	0	0	0	0	0	0	0	0	0	0	0	0	0	0	0	0	0	0	1	0	0	0	0	0	0	0	0	0	0	0	1	cis-acting element involved in cell cycle regulation
	endosperm	GCN4_motif	0	0	0	0	0	0	0	0	0	0	0	0	0	0	0	0	1	0	0	0	0	0	0	0	0	0	0	0	0	1	0	0	0	0	0	0	0	2	cis-regulatory element involved in endosperm expression
	seed	RY-element	1	0	0	0	0	0	0	0	0	0	0	1	0	0	0	0	0	0	0	0	0	0	0	0	0	0	0	0	0	0	0	0	0	0	0	0	0	2	cis-acting regulatory element involved in seed-specific regulation
	Development	O2-site	1	0	0	0	0	0	0	0	0	0	0	0	1	0	0	0	0	0	2	1	1	1	0	0	0	1	0	0	1	0	0	0	0	2	0	0	0	11	cis-acting regulatory element involved in zein metabolism regulation
Abiotic and biotic stresses	anaerobic induction	ARE	0	1	0	0	1	1	0	2	0	1	2	0	1	1	1	1	0	1	1	0	0	0	1	1	0	1	3	0	1	3	0	1	0	1	2	1	1	30	cis-acting regulatory element essential for the anaerobic induction
	anaerobic induction	GC-motif	2	0	0	2	4	0	0	0	4	0	1	2	0	0	0	0	1	0	2	0	3	0	1	0	0	1	0	0	0	0	0	0	1	0	3	0	0	27	enhancer-like element involved in anoxic specific inducibility
	wound	box S	0	0	1	0	0	1	0	0	1	0	0	0	0	0	0	0	0	0	1	1	1	0	0	1	1	0	0	0	0	0	0	1	1	0	0	0	0	10	elicitation; wounding and pathogen responsievness
	wound	W box	1	1	0	0	0	0	0	0	0	0	0	0	0	1	0	1	0	0	0	0	0	0	0	0	1	0	0	0	2	0	1	0	0	0	0	0	1	9	Fungal elicitor responsive element, wound responsive
	wound	WUN-motif	0	0	0	0	0	0	1	0	0	0	0	0	2	0	1	1	1	2	1	0	0	0	0	0	0	0	0	0	0	0	0	0	2	0	0	1	0	12	wound-responsive element
	wound	JERE	0	0	0	0	1	0	0	0	0	0	0	0	0	0	0	0	0	0	0	0	0	0	0	0	0	0	0	0	0	0	0	0	0	1	0	0	0	2	elicitation; wounding and pathogen responsievness
	drought and high-salinity	DRE core	0	0	0	1	1	0	0	1	1	0	0	1	0	0	0	0	0	0	0	0	2	0	2	0	0	0	0	0	0	0	0	0	0	0	0	0	0	9	drought and high-salinity stress responsive genes
	drought	MBS	0	0	2	1	0	0	1	0	0	0	2	0	1	0	1	1	0	0	1	0	2	0	0	0	0	0	0	1	0	0	0	1	1	0	0	0	0	15	MYB binding site involved in drought-inducibility
	high-temperature	STRE	2	2	3	3	4	3	0	1	1	2	3	3	0	1	1	0	2	0	2	2	4	1	1	1	1	3	1	1	0	1	0	2	2	3	4	3	0	63	heat shock protein-related element
	low-temperature	LTR	1	0	0	0	1	0	0	0	1	1	0	0	0	1	0	3	1	0	0	0	0	0	0	0	0	0	0	0	2	0	0	0	0	1	2	1	1	16	cis-acting element involved in low-temperature responsiveness
	stress-responsive	CCAAT-box	1	0	0	2	0	1	2	0	0	0	0	0	0	0	0	1	0	1	1	0	1	0	0	0	0	1	0	0	0	1	1	1	0	0	1	0	0	15	MYBHv1 binding site
	stress-responsive	MYB	2	0	7	1	1	1	2	2	3	3	4	0	3	1	3	3	0	2	2	2	3	3	2	2	1	2	2	2	0	2	2	3	4	0	1	3	1	75	MYB binding site
	stress-responsive	MYB-binding site	0	0	2	0	1	1	0	1	0	1	0	0	0	1	0	0	0	1	0	1	0	1	0	1	1	1	1	1	0	0	1	2	1	0	0	0	1	20	MYB binding site
	stress-responsive	MYB-like sequence	0	0	1	0	0	0	1	0	0	0	1	0	0	0	0	0	0	0	0	0	1	1	1	1	0	1	0	0	0	1	0	0	0	0	0	0	0	9	MYB binding site
	stress-responsive	MYC	0	1	3	0	2	0	0	0	1	2	3	0	4	3	1	4	3	1	1	6	0	1	1	2	6	4	3	2	2	3	2	3	3	3	0	4	3	77	MYC binding site
	stress-responsive	TC-rich repeats	0	0	1	0	0	0	0	0	0	0	0	1	0	0	0	2	0	0	0	0	0	0	0	0	0	0	0	0	0	0	0	0	0	0	0	1	0	5	cis-acting element involved in defense and stress responsiveness
Phytohormone responsive	ABA	ABRE	0	9	0	3	4	0	6	0	11	1	0	0	0	0	2	1	5	2	6	5	6	4	4	0	0	3	0	4	2	1	4	0	1	2	6	0	0	92	cis-acting element involved in the abscisic acid responsiveness
	ABA	ABRE2	0	0	0	0	0	0	0	0	0	0	0	0	0	0	0	0	0	0	0	0	0	0	0	0	0	0	0	0	0	0	0	0	0	0	1	0	0	1	cis-acting element involved in the abscisic acid responsiveness
	ABA	ABRE3a	0	0	0	1	0	0	2	0	0	0	0	0	0	0	0	0	0	1	0	1	1	0	0	0	0	0	0	0	1	0	1	0	1	0	2	0	0	11	cis-acting element involved in the abscisic acid responsiveness
	ABA	ABRE4	0	0	0	1	0	0	2	0	0	0	0	0	0	0	0	0	0	1	0	1	1	0	0	0	0	0	0	0	1	0	1	0	1	0	2	0	0	11	cis-acting element involved in the abscisic acid responsiveness
	SA	as-1	1	7	0	1	2	1	0	0	3	1	2	3	0	0	1	0	2	0	2	2	2	2	2	0	0	0	1	3	0	1	0	1	0	1	3	3	0	47	SA and oxidative responsiveness
	SA	TCA-element	0	0	1	0	0	0	0	1	0	1	0	0	0	0	0	0	0	0	0	0	0	1	0	0	0	0	0	1	0	0	0	0	0	0	0	0	0	5	cis-acting element involved in salicylic acid responsiveness
	IAA	AuxRR-core	0	0	0	0	0	0	0	0	0	0	0	0	0	0	1	0	0	0	0	0	0	1	0	0	0	0	0	1	0	0	0	0	1	2	0	0	0	6	cis-acting regulatory element involved in auxin responsiveness
	IAA	TGA-element	0	2	0	0	0	1	1	0	1	0	0	0	0	1	1	1	3	0	1	0	0	1	2	1	1	0	0	0	0	0	0	0	1	2	0	0	1	21	auxin-responsive element
	GA	CARE	0	0	1	1	0	0	0	0	0	0	0	0	0	0	0	0	0	0	0	0	0	0	0	0	0	0	0	0	0	0	0	0	0	0	0	0	0	2	GA-responsiveness in seeds
	GA	GARE-motif	0	0	0	0	0	1	0	0	0	0	0	0	0	1	0	0	0	0	0	0	0	1	0	0	0	0	0	1	0	0	0	1	0	0	0	0	1	6	gibberellin-responsive element
	GA	P-box	0	1	1	0	0	0	0	0	0	0	0	0	2	0	1	0	0	0	0	0	0	0	0	0	0	0	1	0	0	0	0	0	2	0	0	1	0	9	gibberellin-responsive element
	GA	TATC-box	0	0	0	0	0	0	0	0	1	0	1	0	0	0	0	0	0	0	0	0	0	0	0	0	0	1	0	0	0	0	0	0	0	0	0	0	0	3	cis-acting element involved in gibberellin-responsiveness
	MeJA	TGACG-motif	1	7	0	1	2	1	0	0	3	1	2	3	0	0	1	0	2	0	2	2	2	2	2	0	0	0	1	3	0	1	0	1	0	1	3	3	0	47	cis-acting regulatory element involved in the MeJA-responsiveness
	Ethylen	ERE	0	0	0	0	0	0	0	0	0	0	0	0	0	1	0	0	0	1	0	0	0	0	0	0	0	1	0	0	0	0	0	0	0	0	0	0	1	4	ethylene-responsive element
	Flavonoid	MBSI	0	0	0	0	0	0	0	0	0	0	0	0	0	0	0	0	0	0	0	0	0	0	0	0	0	0	0	0	0	1	0	0	0	0	0	0	0	1	MYB binding site involved in flavonoid biosynthetic genes regulation
Unknown Function	Unknown Function	AAGAA-motif	1	0	0	0	0	0	0	1	0	0	1	0	0	3	1	1	0	1	1	0	0	0	0	0	0	0	2	1	1	0	0	1	1	0	0	0	3	19
	Unknown Function	AT~ABRE	0	0	0	1	0	0	0	0	0	0	0	0	0	0	0	0	0	0	0	0	0	0	0	0	0	0	0	0	1	0	0	0	0	0	0	0	0	2
	Unknown Function	AT~TATA-box	1	0	1	0	0	0	1	2	1	0	1	0	1	1	0	0	0	1	0	2	0	2	0	4	3	0	0	3	0	2	0	0	1	0	0	1	1	29
	Unknown Function	CCGTCC motif	0	0	0	1	1	0	0	0	0	0	0	0	0	0	0	0	0	1	0	0	0	0	2	0	0	0	0	0	0	0	0	0	0	1	2	0	0	8
	Unknown Function	CCGTCC-box	0	0	0	1	1	0	0	0	0	0	0	0	0	0	0	0	0	1	0	0	0	0	2	0	0	0	0	0	0	0	0	0	0	1	2	0	0	8
	Unknown Function	CTAG-motif	0	0	0	0	0	0	0	0	0	0	0	1	0	0	0	0	0	0	1	0	0	0	0	0	0	0	0	0	1	0	0	0	0	0	0	0	0	3
	Unknown Function	DRE1	0	0	0	0	0	0	0	0	0	0	0	0	0	0	0	0	0	0	0	0	1	0	1	0	0	0	0	1	0	0	0	0	0	0	0	0	0	3
	Unknown Function	F-box	0	0	0	0	0	0	0	0	0	0	0	0	0	0	0	0	0	0	0	0	0	0	0	0	0	0	0	0	0	0	0	0	0	0	0	1	0	1
	Unknown Function	GRA	0	0	0	0	0	0	0	0	0	0	0	0	0	0	0	0	0	0	0	0	0	0	0	0	0	0	0	0	0	0	0	0	1	0	0	0	0	1
	Unknown Function	MYB recognition site	1	0	0	2	0	1	2	0	0	0	0	0	0	0	0	1	0	1	1	0	1	0	0	0	0	1	0	0	0	1	1	1	0	0	1	0	0	15
	Unknown Function	NON	0	0	0	0	0	0	0	0	0	0	0	0	0	0	0	0	0	0	0	0	1	0	0	0	0	0	0	0	0	0	0	0	0	0	0	0	0	1
	Unknown Function	Unnamed__1	1	6	0	6	4	1	3	2	10	3	1	3	0	0	1	3	4	1	4	2	3	1	6	0	0	1	0	1	0	2	1	1	1	3	7	0	0	82
	Unknown Function	Unnamed__16	0	0	0	1	0	0	0	0	0	0	0	0	0	0	0	0	0	0	0	0	1	0	0	0	0	0	1	0	0	1	0	0	0	0	0	0	0	4
	Unknown Function	Unnamed__2	0	0	0	2	1	0	0	0	3	0	0	1	0	0	0	0	0	0	0	0	0	0	2	1	1	0	0	0	0	0	0	0	0	0	1	0	0	12
	Unknown Function	Unnamed__4	17	8	11	18	13	10	6	3	7	17	6	11	9	4	7	6	9	10	9	9	12	6	11	9	7	5	7	5	2	8	1	7	14	12	16	1	4	317
	Unknown Function	Unnamed__6	0	0	0	0	0	0	0	0	0	0	0	0	0	0	0	0	0	0	0	0	0	0	0	0	0	0	0	1	0	0	0	0	1	0	0	0	0	2
	Unknown Function	WRE3	0	1	0	2	3	1	1	0	1	0	1	1	0	0	1	2	1	0	1	1	0	1	1	0	0	0	0	1	0	1	0	0	1	0	0	0	0	22
	Unknown Function	Y-box	0	0	0	0	0	0	0	0	0	0	0	0	0	0	0	0	0	0	0	0	0	1	0	0	0	0	0	0	0	0	0	0	1	0	0	0	0	2
	Unknown Function	TATA	0	0	0	0	0	0	0	0	0	0	0	0	0	0	0	0	0	1	0	0	0	0	0	0	0	1	0	0	0	1	0	0	0	1	0	1	0	5
	Unknown Function	TCA	0	0	0	0	0	0	0	0	0	1	0	0	0	2	1	0	0	1	0	0	0	0	0	0	0	0	0	1	0	0	0	0	0	0	0	0	2	8
	Unknown Function	re2f-1	0	1	0	0	0	0	0	0	0	0	0	0	0	0	0	0	0	0	0	0	0	0	0	0	0	0	0	0	0	0	0	0	0	0	0	0	0	1
