# Supplementary material for: Genome-Wide Identification and Characterization of the CCT Gene Family in Foxtail Millet (Setaria italica) Response to Diurnal Rhythm and Abiotic Stress
Source: Genes (Basel). 2022 Oct 10;13(10):1829. doi: 10.3390/genes13101829 (PMC9601966; doi:10.3390/genes13101829)
Supplement: Supplementary file 1 [file genes-13-01829-s001.zip › Table S5.xlsx]

## Sheet: Sheet1
	Table S5 FPKM values of SiCCT genes under long day
			CDS0	CDS4	CDS8	CDS12	CDS16	CDS20	CDS24	CNS0	CNS4	CNS8	CNS12	CNS16	CNS20	CNS24
	Gene_ID		0h	4h	8h	12h	16h	20h	24h	16h	20h	24h	28h	32h	36h	40h
SiCCT1	KQL27760	Seita.1G006700	0	0	0	0	0.0181244	0.0821705	0.0427946	0	0	0	0	0	0	0
SiCCT2	KQL28473	Seita.1G065300	39.8278	39.9204	65.4013	63.8604	54.4704	49.8685	39.236	70.1928	47.7429	40.7606	55.032	71.7403	66.002	63.8766
SiCCT4	KQL30521	Seita.1G236100	2.013	0.44357	4.29261	25.713	17.5145	7.52315	2.36223	13.0285	6.02148	1.46742	0.590252	4.87484	30.6253	19.7731
SiCCT5	KQL31286	Seita.1G301300	40.5296	2.437	2.71182	11.9038	26.8263	49.1324	53.7991	33.9622	63.9229	70.972	3.71698	4.23355	19.3618	46.0825
SiCCT6	KQL31326	Seita.1G304900	0	0	0	0	0	0	0.091267	0.0259232	0	0	0	0	0	0
SiCCT7	KQL31374	Seita.1G308800	22.4357	14.8801	28.4123	69.3791	39.0607	45.5738	25.5188	41.4897	40.694	16.0069	11.5878	23.4669	63.7854	42.5237
SiCCT8	KQL24119	Seita.2G175000	18.405	3.94844	4.75213	11.1314	16.1897	25.2984	25.4666	14.3078	28.7926	28.7393	3.81943	4.15465	15.4954	19.8266
SiCCT9	KQL25444	Seita.2G286100	2.3025	15.5805	62.9466	63.9421	25.8021	1.84844	2.79316	22.2343	1.61534	3.28357	26.7666	83.5974	90.4874	37.2058
SiCCT10	KQL27073	Seita.2G423300	13.9058	10.7202	21.5307	12.7077	15.2751	37.4006	18.4566	15.6204	22.4317	9.42393	12.8367	15.2088	9.78036	9.05589
SiCCT11	KQL27318	Seita.2G444300	0.0142259	0.378462	1.37397	0.710404	0.553832	0	0	0.538748	0.0346723	0	0.387624	0.911728	0.469865	0.604898
SiCCT12	KQL13967	Seita.3G119200	49.4588	37.7673	48.4567	55.1105	45.5236	140.153	44.6065	47.4593	68.376	28.752	36.8383	37.035	34.8837	25.4128
SiCCT13	KQL15112	Seita.3G212400	0.289511	0.183188	0.0708775	0.0481207	0.0409598	0.0996586	0.115866	0.255205	0.142667	0.069317	0.064536	0.0815559	0.0987913	0.0544325
SiCCT14	KQL16011	Seita.3G285700	0	0	0	0	0	0	0	0	0	0	0	0	0	0
SiCCT15	KQL16012	Seita.3G285800	0	0	0	0	0	0	0	0	0	0	0	0	0	0
SiCCT16	KQL10228	Seita.4G116600	65.7965	13.8886	21.0851	37.2124	27.1996	89.9717	68.5841	30.8697	101.82	70.1918	9.80443	13.4469	20.9239	25.4003
SiCCT17	KQL11132	Seita.4G192300	756.027	651.245	964.9	373.291	378.304	509.834	719.721	435.548	513.04	1082.22	703.341	969.712	345.044	396.752
SiCCT18	KQL11783	Seita.4G243700	38.1259	25.7159	32.0428	38.6352	30.8993	41.142	38.919	31.0788	39.5835	35.6985	25.6381	31.8681	27.9246	33.066
SiCCT19	KQK85264	Seita.6G082100	7.78866	4.91577	3.12432	6.54495	5.06438	9.52103	7.34183	6.44448	7.30136	8.29202	3.81554	2.75396	3.89192	3.48942
SiCCT20	KQL01011	Seita.6G096800	1.91014	31.5771	42.1956	25.7266	52.0104	2.06684	1.49402	73.7387	0.408317	3.50412	46.5182	71.6894	70.2761	78.5569
SiCCT21	KQL01176	Seita.6G226200	12.359	7.3316	19.1492	22.8998	14.3257	15.9918	13.8509	13.4593	18.7579	15.3207	6.57491	19.8836	19.4994	16.5013
SiCCT22	KQL02690	Seita.7G007800	0	0.0990841	0.127875	0.145178	0.133945	0	0	0.428627	0	0	0.0995054	0.206134	0.157722	0.0268345
SiCCT23	KQK96183	Seita.7G153500	238.214	227.087	231.331	111.564	116.615	182.778	244.585	135.417	171.064	322.78	210.036	240.12	84.3111	120.996
SiCCT24	KQK97912	Seita.7G334500	0.858567	1.21467	0.213462	0.608617	1.00362	0.443605	0.350143	0.357289	0.378275	0.269788	0.638271	0.313474	0.877432	0.568771
SiCCT25	KQL00040	Seita.8G001200	1.15688	0.471923	0.620369	1.16529	0.660931	0.291098	0.306879	1.20442	0.531582	0.996108	0.570599	0.993918	0.938442	0.999777
SiCCT26	KQK93230	Seita.8G040100	7.22408	3.25219	13.9591	13.7762	6.72874	8.87717	8.87589	6.85316	9.09772	14.2167	5.80062	18.0494	16.1117	9.69843
SiCCT27	KQK93667	Seita.8G159000	0.228794	0	0	0	0	0	0	0	0	0	0	0	0	0
SiCCT28	KQK86275	Seita.9G020100	0	0.0570006	0.135947	0.233155	0.0582595	0	0.0337366	0	0	0	0.0238217	0.148347	0.0275285	0.0568496
SiCCT29	KQK87242	Seita.9G103000	15.3338	11.6602	14.0401	11.6326	16.3327	22.0084	24.193	19.46	25.0631	28.3487	14.3241	23.6076	18.197	29.3797
SiCCT30	KQK87465	Seita.9G119800	86.0493	94.0483	110.24	41.6916	48.6506	46.8993	101.734	55.6816	37.7901	171.471	93.1829	83.0121	35.0984	39.7349
SiCCT31	KQK87704	Seita.9G138400	34.2247	24.1202	26.3634	24.099	20.7014	36.092	37.6317	23.093	30.0432	42.7169	26.6163	27.7325	20.4743	24.6872
SiCCT32	KQK88797	Seita.9G228800	1.12284	1.01122	1.8256	1.37359	1.48023	0.995874	0.470403	1.62314	0.938738	0.718345	0.804467	1.4833	1.04532	0.820994
SiCCT33	KQK89929	Seita.9G323600	18.8121	33.5451	11.0398	2.28407	13.1161	4.6458	26.5957	18.6956	3.12016	38.2944	42.8162	15.2998	3.35735	14.8743
SiCCT34	KQK90887	Seita.9G404500	28.9244	33.0889	37.6664	28.8198	30.0619	40.4353	34.3547	38.8222	39.9694	48.5154	46.1814	55.6508	43.8856	41.7004
SiCCT35	KQK91381	Seita.9G445200	0.784115	35.7178	69.4958	44.808	34.9826	3.06554	1.20021	31.5018	1.71724	1.21295	50.0685	73.0989	44.0688	44.1191
SiCCT36	KQK92647	Seita.9G545700	0.373454	0.13879	0.0789781	0.0842545	0.171382	0.142697	0.294745	0.145392	0.164904	0.290453	0.3113	0.215912	0.384211	0.366137
SiCCT37	KQK95022	Seita.J028500	0	0	0	0	0	0	0	0	0	0	0	0	0	0

## Sheet: Sheet2
	Table S5 FPKM values of SiCCT genes under long day
			CDS0	CDS4	CDS8	CDS12	CDS16	CDS20	CDS24	CNS0	CNS4	CNS8	CNS12	CNS16	CNS20	CNS24
	Gene_ID		0h	4h	8h	12h	16h	20h	24h	16h	20h	24h	28h	32h	36h	40h
SiCCT2	KQL28473	Seita.1G065300	39.8278	39.9204	65.4013	63.8604	62.3316	48.8057	39.9984	62.3316	48.8057	39.9984	55.032	71.7403	66.002	63.8766
SiCCT2	KQL28473	Seita.1G065300	39.8278	39.9204	65.4013	63.8604	54.4704	49.8685	39.236	70.1928	47.7429	40.7606	55.032	71.7403	66.002	63.8766
SiCCT4	KQL30521	Seita.1G236100	2.013	0.44357	4.29261	25.713	15.2715	6.77231	1.91482	15.2715	6.77231	1.91482	0.590252	4.87484	30.6253	19.7731
SiCCT4	KQL30521	Seita.1G236100	2.013	0.44357	4.29261	25.713	17.5145	7.52315	2.36223	13.0285	6.02148	1.46742	0.590252	4.87484	30.6253	19.7731
SiCCT5	KQL31286	Seita.1G301300	40.5296	2.437	2.71182	11.9038	30.3942	56.5276	62.3855	30.3942	56.5276	62.3855	3.71698	4.23355	19.3618	46.0825
SiCCT5	KQL31286	Seita.1G301300	40.5296	2.437	2.71182	11.9038	26.8263	49.1324	53.7991	33.9622	63.9229	70.972	3.71698	4.23355	19.3618	46.0825
SiCCT7	KQL31374	Seita.1G308800	22.4357	14.8801	28.4123	69.3791	40.2752	43.1339	20.7628	40.2752	43.1339	20.7628	11.5878	23.4669	63.7854	42.5237
SiCCT7	KQL31374	Seita.1G308800	22.4357	14.8801	28.4123	69.3791	39.0607	45.5738	25.5188	41.4897	40.694	16.0069	11.5878	23.4669	63.7854	42.5237
SiCCT8	KQL24119	Seita.2G175000	18.405	3.94844	4.75213	11.1314	15.2487	27.0455	27.1029	15.2487	27.0455	27.1029	3.81943	4.15465	15.4954	19.8266
SiCCT8	KQL24119	Seita.2G175000	18.405	3.94844	4.75213	11.1314	16.1897	25.2984	25.4666	14.3078	28.7926	28.7393	3.81943	4.15465	15.4954	19.8266
SiCCT9	KQL25444	Seita.2G286100	2.3025	15.5805	62.9466	63.9421	24.0182	1.73189	3.03836	24.0182	1.73189	3.03836	26.7666	83.5974	90.4874	37.2058
SiCCT9	KQL25444	Seita.2G286100	2.3025	15.5805	62.9466	63.9421	25.8021	1.84844	2.79316	22.2343	1.61534	3.28357	26.7666	83.5974	90.4874	37.2058
SiCCT11	KQL27318	Seita.2G444300	0.0142259	0.378462	1.37397	0.710404	0.54629	0.0173362	0	0.54629	0.0173362	0	0.387624	0.911728	0.469865	0.604898
SiCCT11	KQL27318	Seita.2G444300	0.0142259	0.378462	1.37397	0.710404	0.553832	0	0	0.538748	0.0346723	0	0.387624	0.911728	0.469865	0.604898
SiCCT16	KQL10228	Seita.4G116600	65.7965	13.8886	21.0851	37.2124	29.0346	95.8957	69.3879	29.0346	95.8957	69.3879	9.80443	13.4469	20.9239	25.4003
SiCCT16	KQL10228	Seita.4G116600	65.7965	13.8886	21.0851	37.2124	27.1996	89.9717	68.5841	30.8697	101.82	70.1918	9.80443	13.4469	20.9239	25.4003
SiCCT17	KQL11132	Seita.4G192300	756.027	651.245	964.9	373.291	406.926	511.437	900.971	406.926	511.437	900.971	703.341	969.712	345.044	396.752
SiCCT17	KQL11132	Seita.4G192300	756.027	651.245	964.9	373.291	378.304	509.834	719.721	435.548	513.04	1082.22	703.341	969.712	345.044	396.752
SiCCT19	KQK85264	Seita.6G082100	7.78866	4.91577	3.12432	6.54495	5.75443	8.4112	7.81693	5.75443	8.4112	7.81693	3.81554	2.75396	3.89192	3.48942
SiCCT19	KQK85264	Seita.6G082100	7.78866	4.91577	3.12432	6.54495	5.06438	9.52103	7.34183	6.44448	7.30136	8.29202	3.81554	2.75396	3.89192	3.48942
SiCCT26	KQK93230	Seita.8G040100	7.22408	3.25219	13.9591	13.7762	6.79095	8.98744	11.5463	6.79095	8.98744	11.5463	5.80062	18.0494	16.1117	9.69843
SiCCT26	KQK93230	Seita.8G040100	7.22408	3.25219	13.9591	13.7762	6.72874	8.87717	8.87589	6.85316	9.09772	14.2167	5.80062	18.0494	16.1117	9.69843
SiCCT28	KQK86275	Seita.9G020100	0	0.0570006	0.135947	0.233155	0.0291297	0	0.0168683	0.0291297	0	0.0168683	0.0238217	0.148347	0.0275285	0.0568496
SiCCT28	KQK86275	Seita.9G020100	0	0.0570006	0.135947	0.233155	0.0582595	0	0.0337366	0	0	0	0.0238217	0.148347	0.0275285	0.0568496
SiCCT31	KQK87704	Seita.9G138400	34.2247	24.1202	26.3634	24.099	21.8972	33.0676	40.1743	21.8972	33.0676	40.1743	26.6163	27.7325	20.4743	24.6872
SiCCT31	KQK87704	Seita.9G138400	34.2247	24.1202	26.3634	24.099	20.7014	36.092	37.6317	23.093	30.0432	42.7169	26.6163	27.7325	20.4743	24.6872
SiCCT32	KQK88797	Seita.9G228800	1.12284	1.01122	1.8256	1.37359	1.55169	0.967306	0.594373	1.55169	0.967306	0.594373	0.804467	1.4833	1.04532	0.820994
SiCCT32	KQK88797	Seita.9G228800	1.12284	1.01122	1.8256	1.37359	1.48023	0.995874	0.470403	1.62314	0.938738	0.718345	0.804467	1.4833	1.04532	0.820994
SiCCT33	KQK89929	Seita.9G323600	18.8121	33.5451	11.0398	2.28407	15.9059	3.88298	32.445	15.9059	3.88298	32.445	42.8162	15.2998	3.35735	14.8743
SiCCT33	KQK89929	Seita.9G323600	18.8121	33.5451	11.0398	2.28407	13.1161	4.6458	26.5957	18.6956	3.12016	38.2944	42.8162	15.2998	3.35735	14.8743
SiCCT35	KQK91381	Seita.9G445200	0.784115	35.7178	69.4958	44.808	33.2422	2.39139	1.20658	33.2422	2.39139	1.20658	50.0685	73.0989	44.0688	44.1191
SiCCT35	KQK91381	Seita.9G445200	0.784115	35.7178	69.4958	44.808	34.9826	3.06554	1.20021	31.5018	1.71724	1.21295	50.0685	73.0989	44.0688	44.1191
